# Supplementary material for: iDNAProt-ES: Identification of DNA-binding Proteins Using Evolutionary and Structural Features
Source: PubMed Central journal article supplement (PMC5668250; doi:10.1038/s41598-017-14945-1), 2017-11-02
Supplement: 41598_2017_14945_MOESM1_ESM.pdf [file 41598_2017_14945_MOESM1_ESM.pdf]

# iDNAProt-ES: Identification of DNA-binding Proteins Using Evolutionary and Structural Features

Shahana Yasmin Chowdhury<sup>1,\*</sup>, Swakkhar Shatabda<sup>1</sup>, and Abdollah Dehzangi<sup>2</sup>

<sup>1</sup>Department of Computer Science and Engineering, United International University, House 80, Road 8A, Dhanmondi, Dhaka-1209, Bangladesh

<sup>2</sup>Department of Computer Science, Morgan State University, Baltimore, Maryland, United States

\*Correspondence to: swakkhar@cse.uui.ac.bd

## Supporting Information # 1

List of features selected by the recursive feature elimination technique from all the combined evolutionary and structural features. The table below contains the feature number and the feature group it comes from.

| Feature Number | Feature Group |
|----------------|---------------|
| Feature_110    | Dubchuck      |
| Feature_142    | PSSM Bigram   |
| Feature_145    | PSSM Bigram   |
| Feature_146    | PSSM Bigram   |
| Feature_187    | PSSM Bigram   |
| Feature_219    | PSSM Bigram   |
| Feature_250    | PSSM Bigram   |
| Feature_264    | PSSM Bigram   |
| Feature_266    | PSSM Bigram   |
| Feature_272    | PSSM Bigram   |
| Feature_277    | PSSM Bigram   |
| Feature_279    | PSSM Bigram   |
| Feature_380    | PSSM Bigram   |
| Feature_321    | PSSM Bigram   |
| Feature_323    | PSSM Bigram   |
| Feature_324    | PSSM Bigram   |
| Feature_330    | PSSM Bigram   |
| Feature_335    | PSSM Bigram   |
| Feature_342    | PSSM Bigram   |
| Feature_346    | PSSM Bigram   |
| Feature_373    | PSSM Bigram   |
| Feature_386    | PSSM Bigram   |
| Feature_393    | PSSM Bigram   |
| Feature_427    | PSSM Bigram   |
| Feature_444    | PSSM Bigram   |
| Feature_459    | PSSM Bigram   |
| Feature_475    | PSSM Bigram   |
| Feature_479    | PSSM Bigram   |

|              |                             |
|--------------|-----------------------------|
| Feature_496  | PSSM Bigram                 |
| Feature_522  | PSSM Bigram                 |
| Feature_574  | PSSM Auto-Covariance        |
| Feature_577  | PSSM Auto-Covariance        |
| Feature_590  | PSSM Auto-Covariance        |
| Feature_593  | PSSM Auto-Covariance        |
| Feature_601  | PSSM Auto-Covariance        |
| Feature_610  | PSSM Auto-Covariance        |
| Feature_622  | PSSM Auto-Covariance        |
| Feature_640  | PSSM Auto-Covariance        |
| Feature_641  | PSSM Auto-Covariance        |
| Feature_666  | PSSM Auto-Covariance        |
| Feature_690  | PSSM Auto-Covariance        |
| Feature_694  | PSSM Auto-Covariance        |
| Feature_703  | PSSM Auto-Covariance        |
| Feature_714  | PSSM Auto-Covariance        |
| Feature_736  | PSSM Auto-Covariance        |
| Feature_742  | PSSM Auto-Covariance        |
| Feature_754  | PSSM 1-lead Bigram          |
| Feature_767  | PSSM 1-lead Bigram          |
| Feature_775  | PSSM 1-lead Bigram          |
| Feature_799  | PSSM 1-lead Bigram          |
| Feature_808  | PSSM 1-lead Bigram          |
| Feature_815  | PSSM 1-lead Bigram          |
| Feature_858  | PSSM 1-lead Bigram          |
| Feature_862  | PSSM 1-lead Bigram          |
| Feature_908  | PSSM 1-lead Bigram          |
| Feature_911  | PSSM 1-lead Bigram          |
| Feature_928  | PSSM 1-lead Bigram          |
| Feature_946  | PSSM 1-lead Bigram          |
| Feature_951  | PSSM 1-lead Bigram          |
| Feature_974  | PSSM 1-lead Bigram          |
| Feature_992  | PSSM 1-lead Bigram          |
| Feature_1004 | PSSM 1-lead Bigram          |
| Feature_1029 | PSSM 1-lead Bigram          |
| Feature_1040 | PSSM 1-lead Bigram          |
| Feature_1064 | PSSM Segmented Distribution |
| Feature_1075 | PSSM Segmented Distribution |
| Feature_1089 | PSSM Segmented Distribution |
| Feature_1090 | PSSM Segmented Distribution |
| Feature_1094 | PSSM Segmented Distribution |
| Feature_1104 | PSSM Segmented Distribution |
| Feature_1119 | PSSM Segmented Distribution |
| Feature_1131 | PSSM Segmented Distribution |
| Feature_1134 | PSSM Segmented Distribution |
| Feature_1219 | PSSM Segmented Distribution |
| Feature_1273 | PSSM Segmented Distribution |
| Feature_1283 | PSSM Segmented Distribution |

|              |                               |
|--------------|-------------------------------|
| Feature_1308 | PSSM Segmented Distribution   |
| Feature_1373 | Angles Bigram                 |
| Feature_1376 | Angles Bigram                 |
| Feature_1386 | Angles Bigram                 |
| Feature_1392 | Angles Bigram                 |
| Feature_1393 | Angles Bigram                 |
| Feature_1486 | Angles Auto-Covariance        |
| Feature_1519 | Probabilities Auto-Covariance |
| Feature_1528 | Probabilities Auto-Covariance |
| Feature_1537 | Probabilities Auto-Covariance |
